# Supplementary material
Source: MDPI journal article supplement (https://www.mdpi.com/2071-1050/15/6/5038)

**Supplementary Figure S1.** Linear discriminant analysis (LDA) of bacterial and fungal communities(a) Bacteria; (b) Fungi.

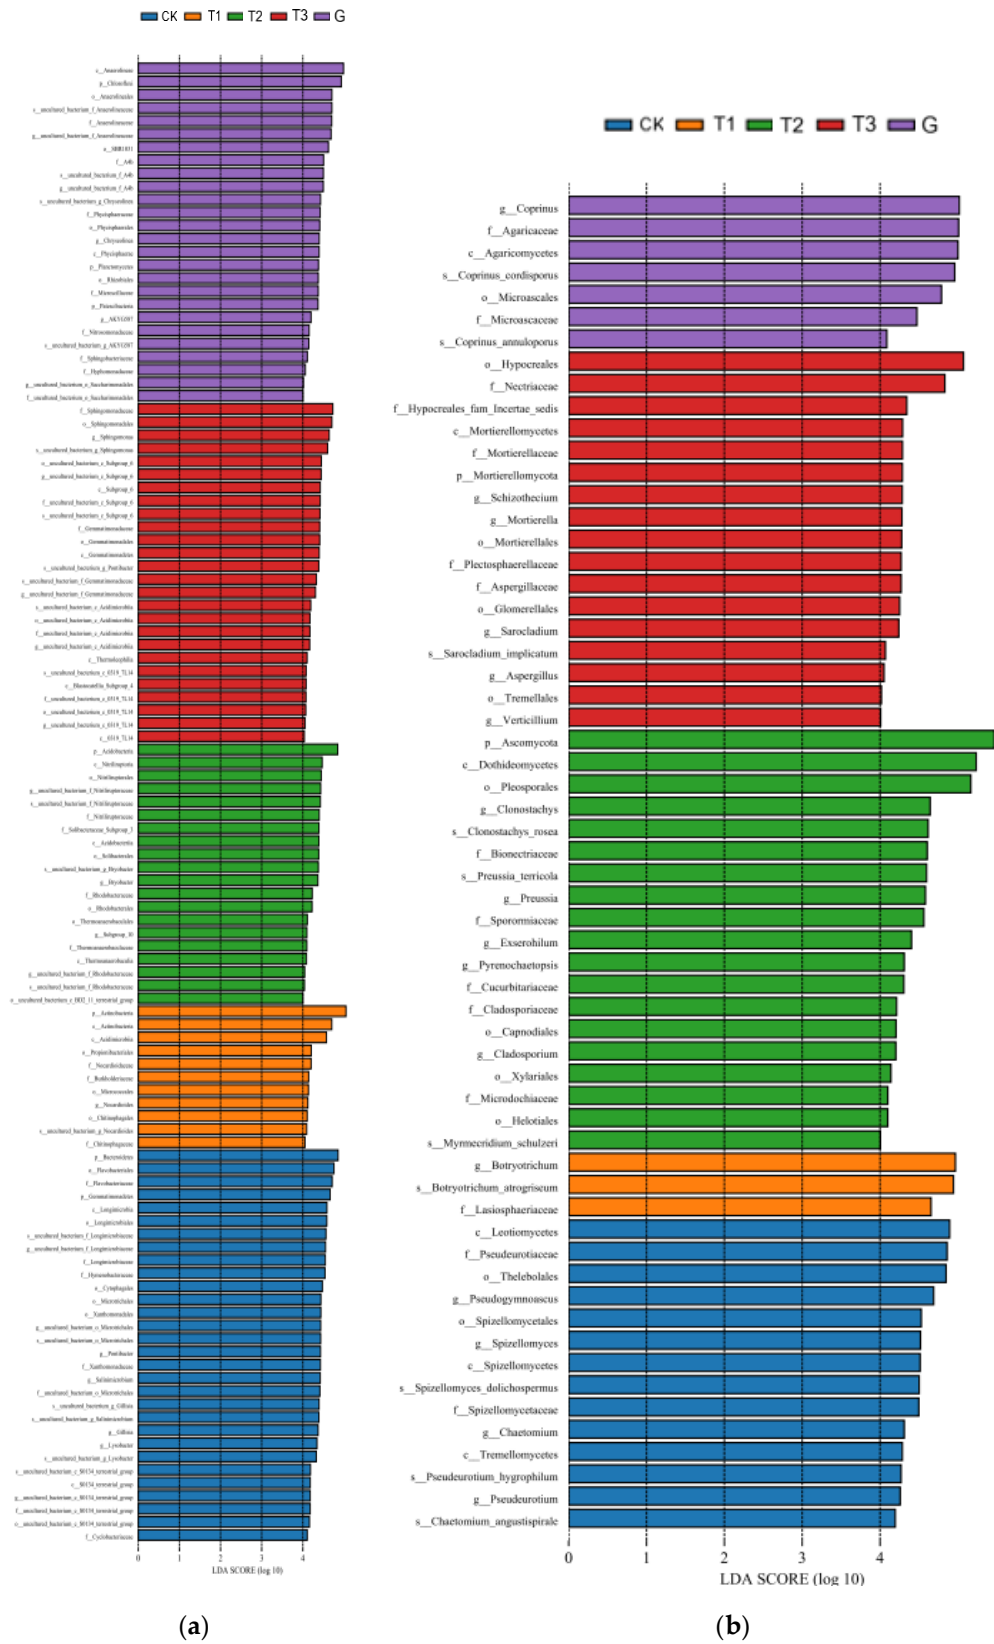

Supplement: s1 [file s1]
